# Supplementary material for: High Perforin‐Positive Cardiac Cell Infiltration and Male Sex Predict Adverse Long‐Term Mortality in Patients With Inflammatory Cardiomyopathy
Source: PubMed Central journal article supplement — J Am Heart Assoc. 2017 Aug 18;6(8):e005352. doi: 10.1161/JAHA.116.005352 (PMC5586411; doi:10.1161/jaha.116.005352), 2017-08-18

# **Supplemental Material**

**Table S1.** Primer used to test the presence of viral genome.

| name | virus     | forward/reverse | sequenz 5' - 3'                      |
|------|-----------|-----------------|--------------------------------------|
| ADV1 | ADV       | forward         | 5'- ACT ACA AYA TTg gCT ACC Agg -3   |
| ADV2 | ADV       | reverse         | 5'- CAA AAC ATA AAg AAg KgT ggg C -3 |
| ADV3 | ADV       | forward         | 5'- AAC TTC CAg CCC ATg AgC Mg -3'   |
| ADV4 | ADV       | reverse         | 5'- CTC AAA AgT CAT gTC BAg CgC -3'  |
| COX1 | Coxsackie | forward         | 5'-Cgg TAC CTT TgT gCg CCT gT -3'    |
| COX2 | Coxsackie | reverse         | 5'-CAg gCC gCC AAC gCA gCC-3'        |
| COX3 | Coxsackie | forward         | 5'-CCC Cgg ACT gAg TAT CAA TA-3'     |
| COX4 | Coxsackie | reverse         | 5'-ggC CgC CAA CgC AgC CAC Cg-3'     |
| EBV1 | EBV       | forward         | 5'-CAA gCT TTT gAC CAA gCT ACC-3'    |
| EBV2 | EBV       | reverse         | 5'-Cag Cag TTg CTT AAA CTT ggC-3'    |
| EBV3 | EBV       | reverse         | 5'-Agg CCA gCT AAC TgC CTA TC-3'     |
| EBV4 | EBV       | forward         | 5'-AAT gTC TgC TAg CTg TTg TCC-3'    |
| U94A | HHV6      | forward         | 5'-CATCgCATACgTCTCCCAg-3'            |
| U94B | HHV6      | reverse         | 5'-TCTCTAACgTgYCCgTgCC-3'            |
| U94C | HHV6      | forward         | 5'-CCCATTggAACTgTggTCT-3'            |
| U94D | HHV6      | reverse         | 5'-YAgRgATATgCACTCACCG-3'            |
| PVB1 | B19V      | forward         | 5'- AgC ATg Tgg AgT gAg ggg gC -3'   |
| PVB2 | B19V      | reverse         | AAA gCA TCA ggR gCT ATA CTT CC       |
| PVB3 | B19V      | forward         | 5'-gCC AAY TCT gTR ACY TgT AC-3'     |
| PVB4 | B19V      | reverse         | AAA TAT CTC CAT ggK gTT gAg          |

ADV – Adenovirus; COX – Coxsackievirus; EBV – Epstein-Barr virus; HHV6 – Human Herpes virus 6; B19V – parvovirus B19.

**Figure S1.** Regression analysis of perforin-positive cells vs. CD8-positive T cells in a subgroup of 230 patients

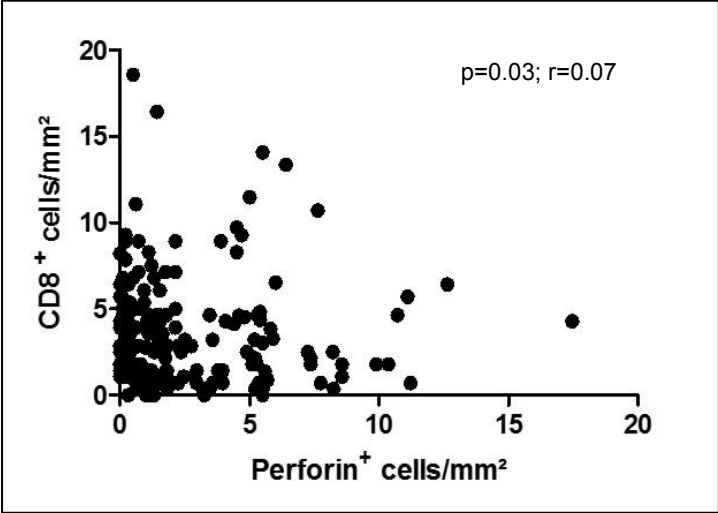

Supplement: JAH3-6-e005352-s001.pdf [file JAH3-6-e005352-s001.pdf]
